# Supplementary material for: Mutational Signatures as Sensors of Environmental Exposures: Analysis of Smoking-Induced Lung Tissue Remodeling
Source: MDPI journal article supplement (doi:10.3390/biom12101384), 2022-09-27
Supplement: s1 [file s1]

Supplementary Information

Mutational Signatures as Sensors of Environmental Exposures:  
Analysis of Smoking-induced Lung Tissue Remodeling

Yoo-Ah Kim\*, Ermin Hodzic\*, Bayarbaatar Amgalan,  
Ariella Saslafsky, Damian Wojtowicz, and Teresa M. Przytycka<sup>+</sup>

National Center for Biotechnology Information, National Library of Medicine,  
National Institutes of Health, Bethesda, MD 20894, USA

Supplemental Figures

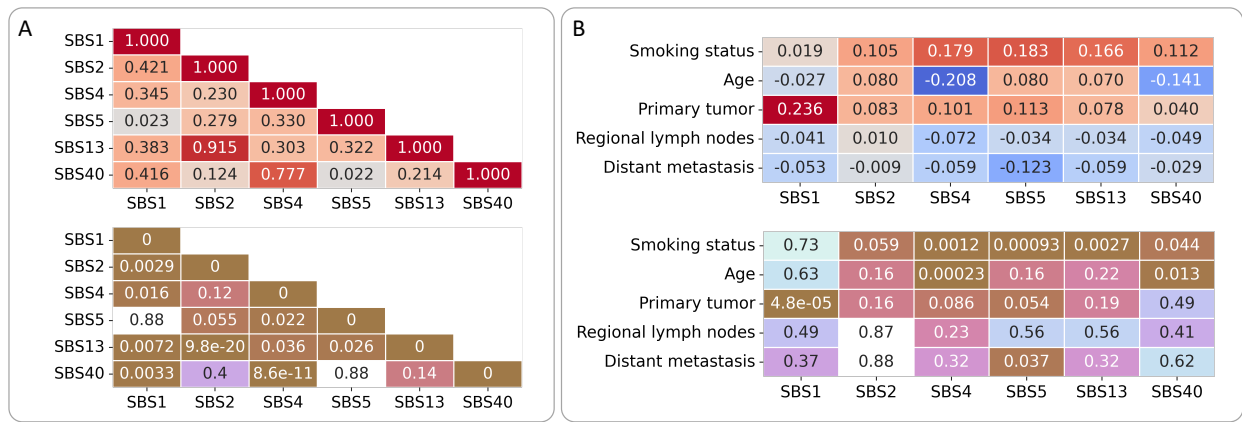

Figure S1: **Spearman correlations (above) and corresponding P-values (below) represent the pairwise associations in control samples.** A. Correlations between signature exposures. B. Correlations between exposure of each signature and smoking status, age and pathological status of patients.

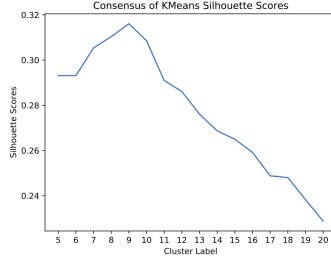

(a)

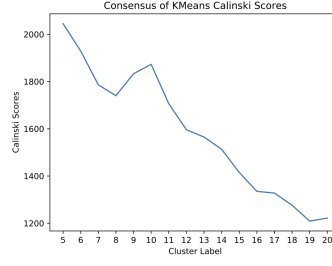

(b)

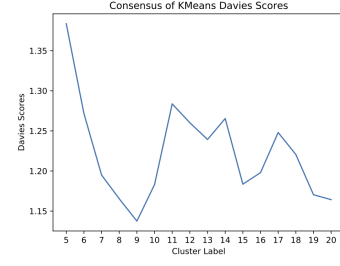

(c)

Figure S2: **Evaluation of clustering for varying  $k$ 's (the number of clusters) using different metrics:** (a) Silhouette Index, (b) Calinski-Harabasz Index, and (c) Davies-Bouldin Index.
